# Supplementary material
Source: publisher site journal article supplement (https://www.dovepress.com/article/464788)

**Supplement Information**

**
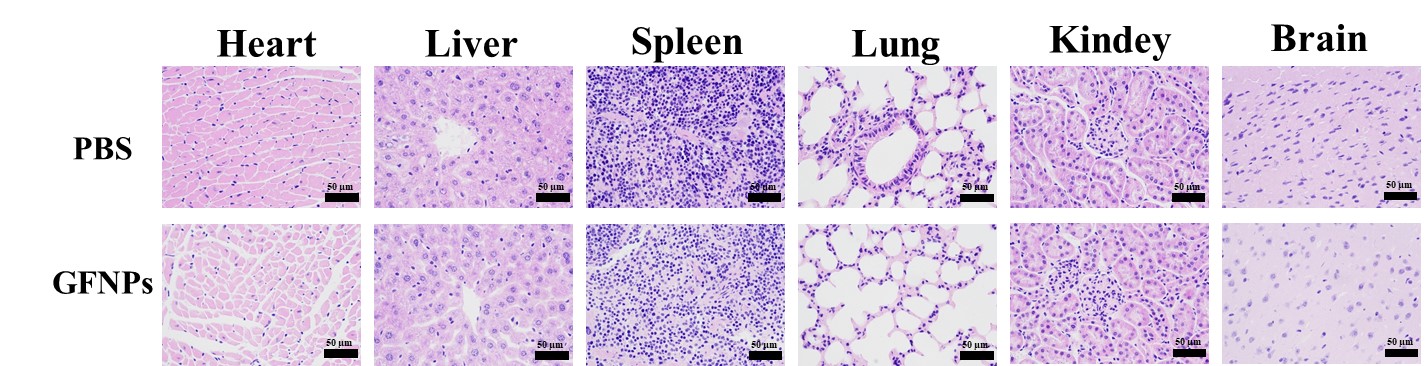
**

**Fig. S1** HE staining after mice injected with GFNPs and PBS. Scale bar = 50 µm.

**
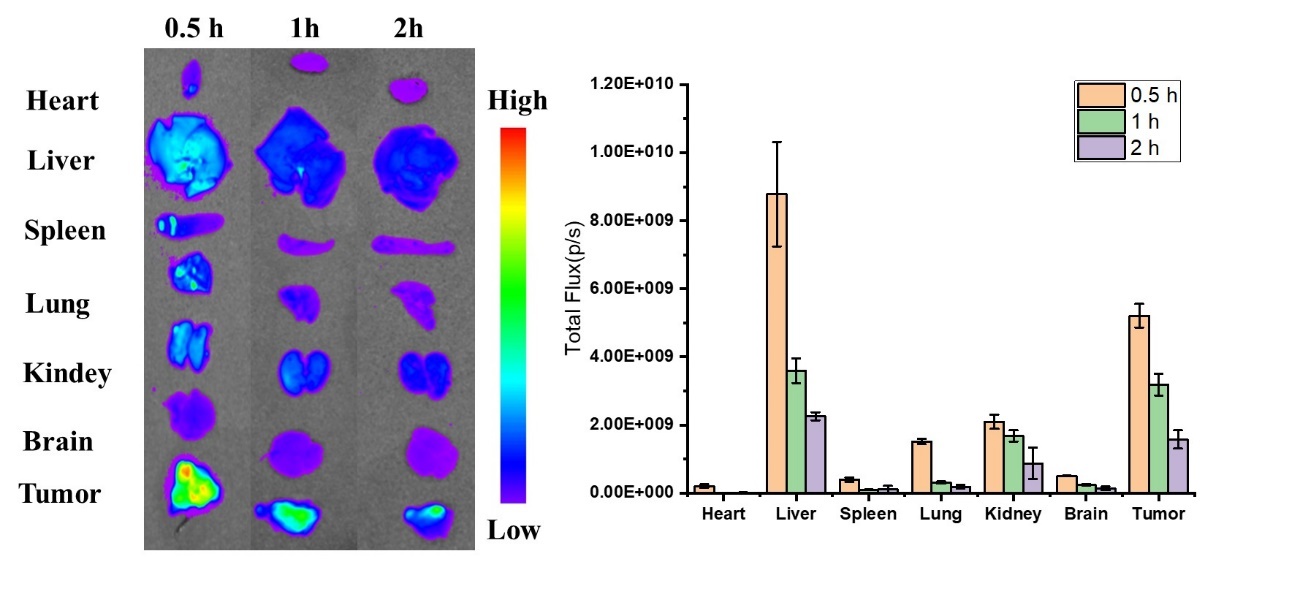
**

**Fig. S2** GFNPs body metabolism from 0.5 h to 2 h. Data was exhibited as the Mean ± SEM. n=5. * p < 0.05, ** p < 0.01.


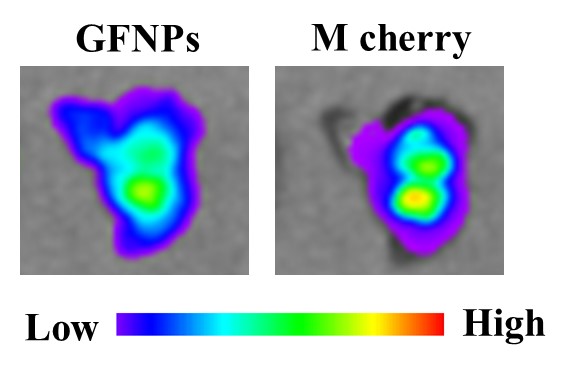


**Fig. S3** GFNPs tissue fluorescence imaging in tumor tissue formed by M cherry marked SW1990 cells.


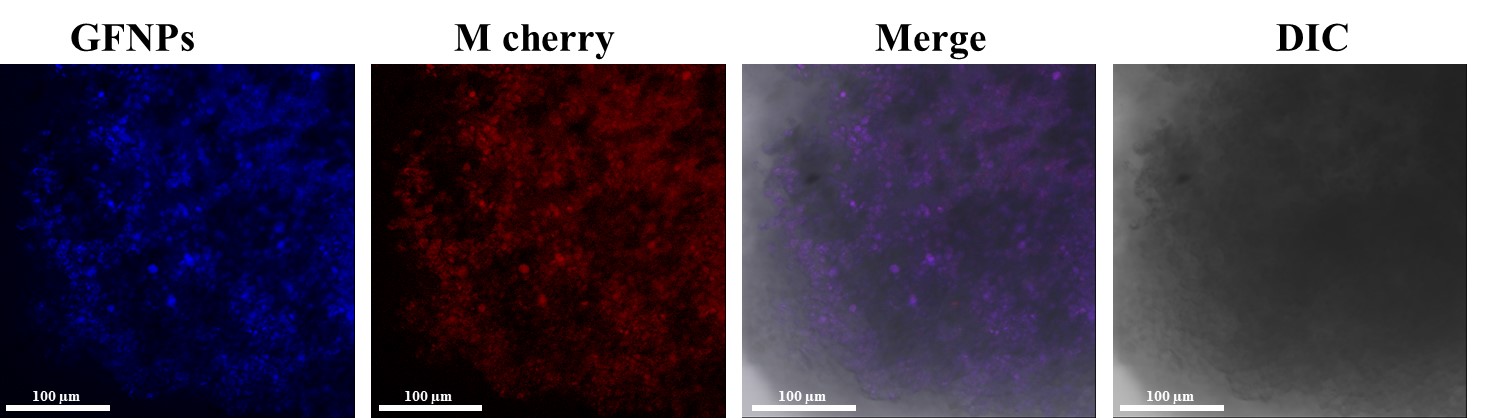


**Fig. S4** GFNPs fluorescence imaging in spheroid formed by M cherry marked SW1990 cells. Scale bar = 100 µm.

**
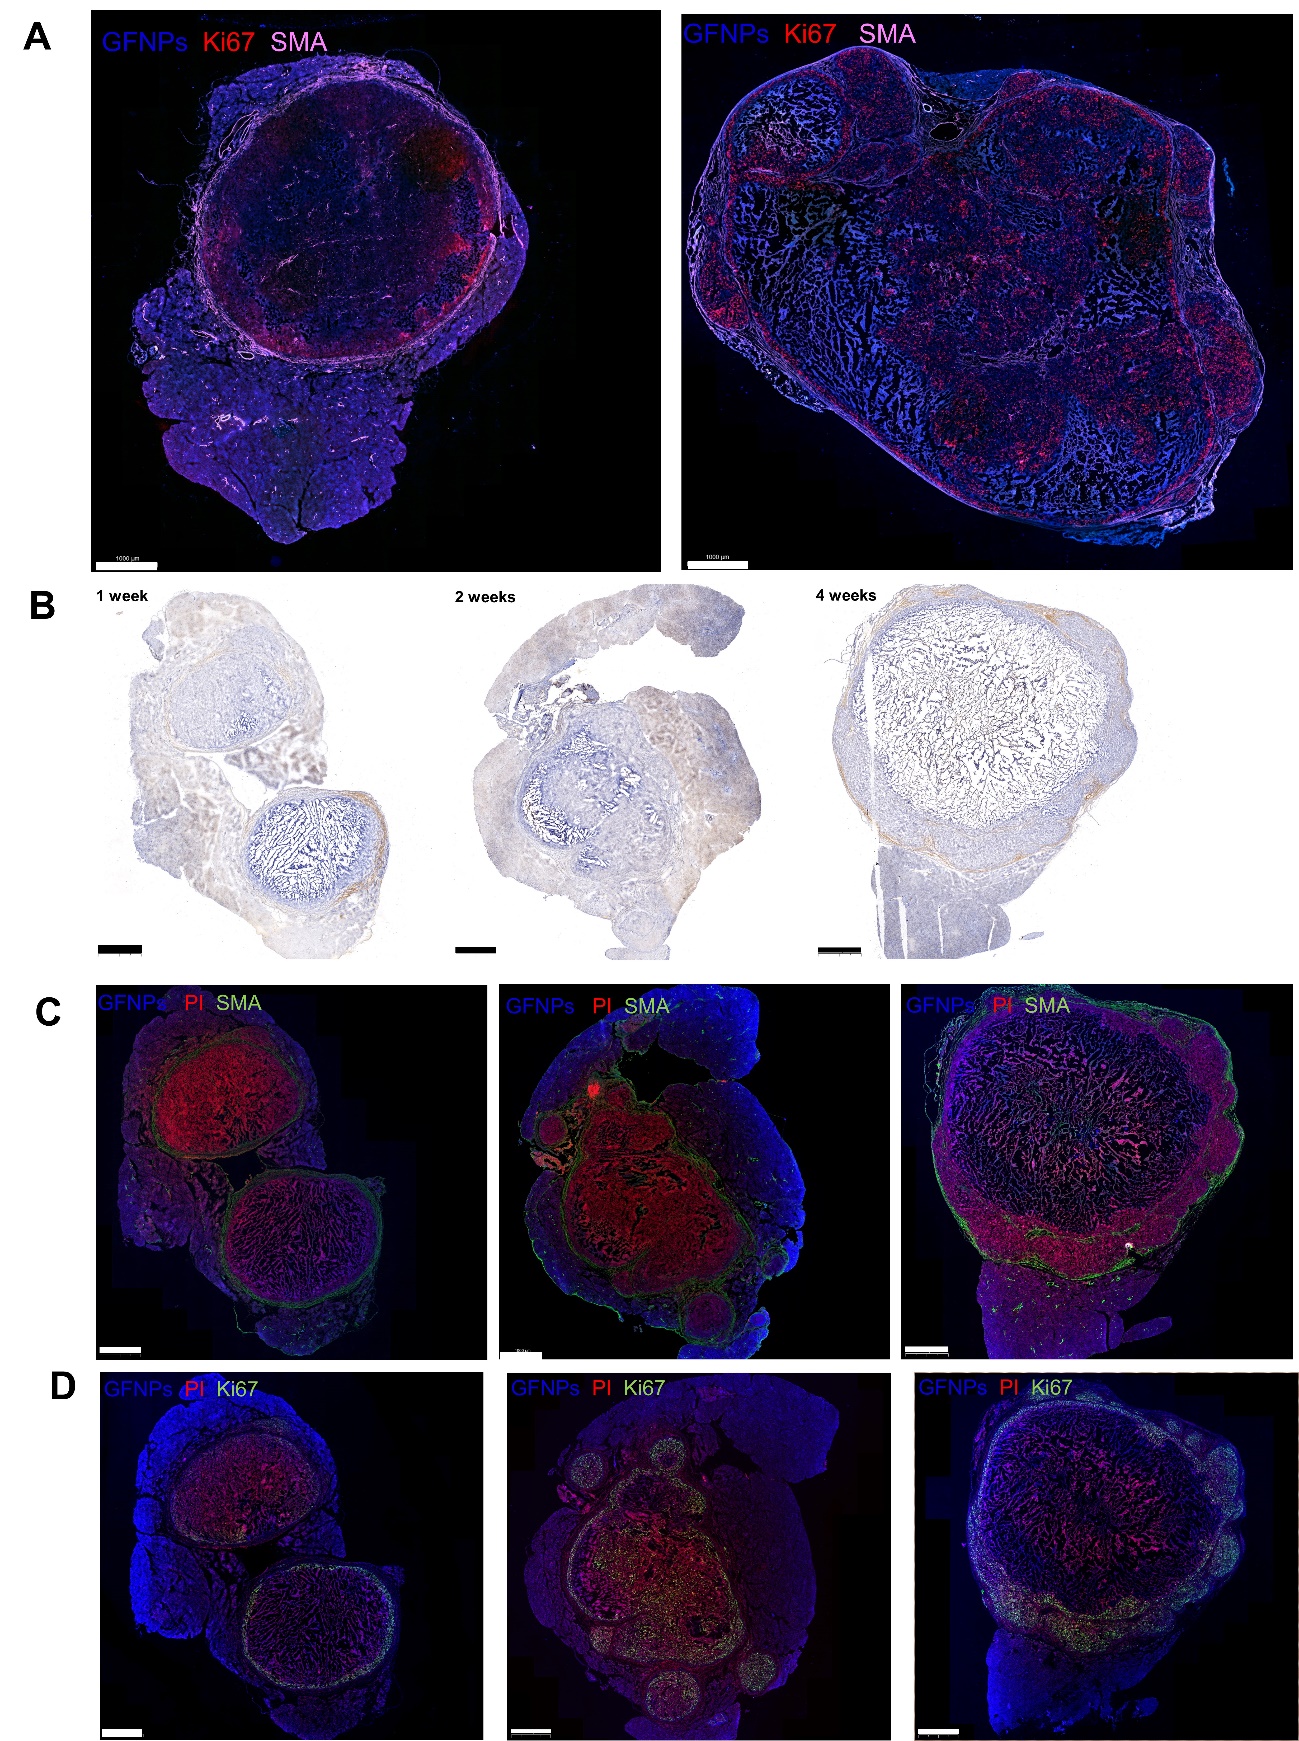
**

**Fig. S5** (A) Immunofluorescence scans of 2 and 4 weeks orthotopic transplanted pancreatic tumor tissue. Blue-GFNPs, Red-PI, Green-SMA. (B) Immunohistochemical tracings of SMA in orthotopic transplanted pancreatic tumor tissue at 1, 2 and 4 weeks. (C) Immunofluorescence scans of 1, 2 and 4 weeks orthotopic transplanted pancreatic tumor tissue. Blue-GFNPs, Red-PI, Green-SMA. (D) Immunofluorescence scans of 1, 2 and 4 weeks orthotopic transplanted pancreatic tumor tissue. Blue-GFNPs, Red-PI, Green-Ki67. Scale bar = 1000 µm.


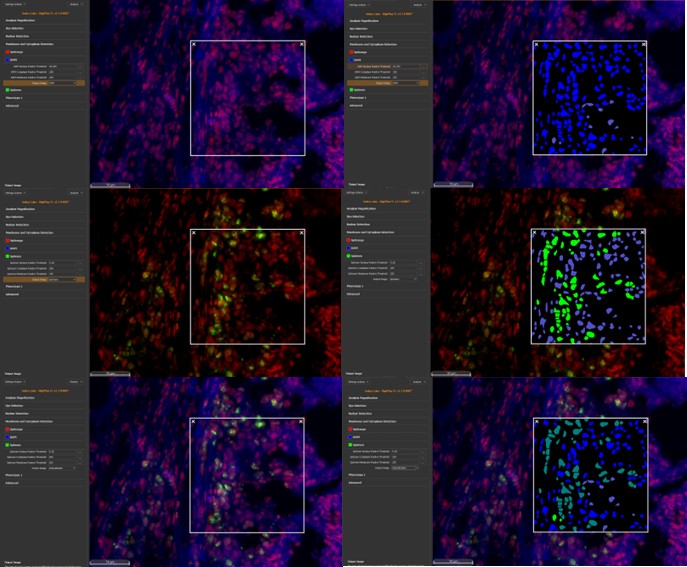


**Fig. S6** Display diagram of the application of the analysis software.

**Fig. S7** GFNPs in vitro fluorescence imaging. (A)blank. (B)Air exposure to change SW1990 cells membrane permeability. (C-D) GFNPs fluorescence imaging in spheroid formed by SW1990 cells. Scale bar = 20 µm.

**Fig. S8** GFNPs fluorescence signal intensity was proportional to the tumor proliferation cycle. Data was exhibited as the Mean ± SEM. n=5.

**Table S1** Clinical information for patients with pancreatic cancer. Ethical Number: CHEC2022-018.


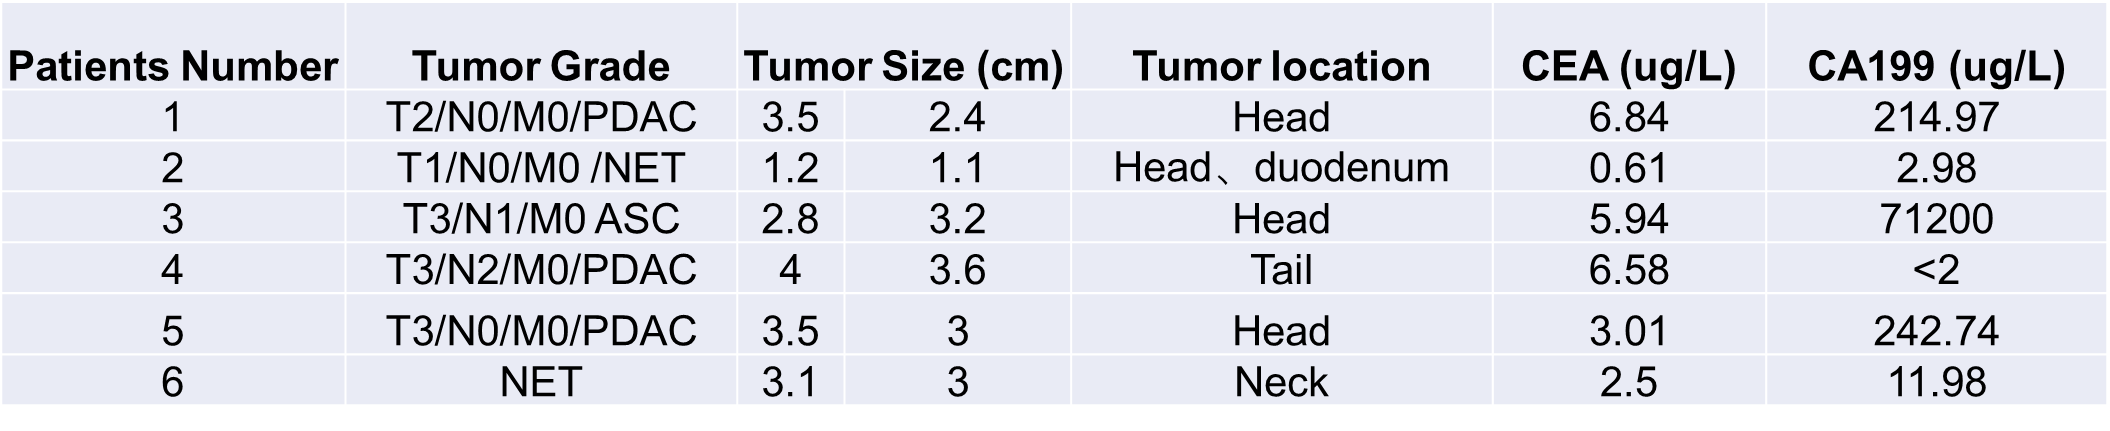

Supplement: Supplementary file 1 [file get_supplementary_file.php]
